# Supplementary material
Source: HighWire-hosted journal article supplement (https://jnis.bmj.com/content/12/3/283)
Supplement: inline-supplementary-material-1 [file inline-supplementary-material-1.docx]

| Online supplementary table 1: Overview of peri-procedural antiplatelet regimen | | | | | | | | | |
| --- | --- | --- | --- | --- | --- | --- | --- | --- | --- |
|  | | **Pre-intervention** | **During intervention** | | | | | | **Post-intervention** |
| **ASA** | **P2Y12-inhibitors** | | | **Glycoprotein IIb/IIIA receptorantagonists** | |
|  | + S/C | Description | ASA | Clopidogrel | Ticagrelor | Prasugrel | Abciximab (ReoPro) | Eptifibatide (integrilin) | Description |
| 1 |  |  | 500mg i.v. (Start of procedure) | 600mg per os1 tube (Start of procedure) |  |  |  |  |  |
| 2 | C |  | 500mg i.v. (Start of procedure | 600mg per os (Start of procedure) |  |  |  |  |  |
| 3 | S |  | 500mg i.v. (Start of procedure | 600mg per os (Start of procedure) |  |  |  |  |  |
| 4 |  |  | 500mg i.v. (Start of procedure) | 600mg per os (Start of procedure) |  |  |  |  |  |
| 5 |  | DATA MISSING |  |  |  |  |  |  |  |
| 6 |  | 600mg clopidogrel per os 4 hours prior to start of intervention | 500mg i.v. (Start of procedure) |  |  |  |  |  |  |
| 7 | C |  | 500mg i.v. (Start of procedure) | 300mg per os (Start of procedure) |  |  |  |  |  |
| 8 | C |  | 500mg i.v. (Start of procedure) |  | 180mg per os (start of procedure) |  | 10mg i.v. bolus directly after occurrence of thrombus formation 🡪 thrombus resolved. |  |  |
| 9 |  | Ticagrelor 180mg over nasogastric tube on intensive care directly prior to intervention | 500mg i.v. (Start of procedure) |  |  |  |  |  |  |
| 10 | C |  | 500mg i.v. (Start of procedure) |  |  |  | 20mg i.v. 2 hours after start of the procedure |  | ReoPro infusion of 7.2mg/12 hours after procedure |
| 11 |  |  | 500mg i.v. (one hour into procedure) | 450mg per os (1.5 hours into procedure) |  |  |  |  |  |
| 12 | C |  | 500mg i.v. (3 hours into procedure (total procedure took 4.5 hours) | 450mg per os (4 hours into procedure) | 17.5mg (4 hours into procedure) |  |  |  | ReoPro infusion of 4.2ml/h for 12 hours after procedure |
| 13 | C | - 100mg ASA per os daily, starting 3 days prior to intervention - 300mg clopidogrel per os 3 days prior to FD placement. At days -2, -1 and day of intervention: 75mg per os daily |  |  |  |  |  |  |  |
| 14 |  |  | 500mg i.v. 2 hours before FD placement | 450mg per os, right before FD placement |  |  |  |  |  |
| 15 | C |  | 500mg i.v. | 600mg per os |  |  |  |  |  |
| 16 |  |  | 500mg i.v. | 600mg per os |  |  |  |  |  |
| 17 |  | - 500mg ASA 1 day prior to intervention + 100mg per os in the morning of day of intervention - 300mg clopidogrel per os 1 day prior to intervention + 75mg per os in the morning of day of intervention. |  |  |  |  |  |  |  |
| 18 | S+C |  | 500mg i.v. (2 hours into procedure, total procedure took about 4 hours) | 450mg per os (2 hours into procedure) |  |  |  |  |  |
| 19 |  | DATA MISSING |  |  |  |  |  |  |  |
| 20 |  | 325 mg ASA one day prior to intervention and 325mg in the morning on the day of intervention |  |  |  |  |  | Total dose during procedure: 20.6mg, exact timing unknown. |  |
| 21 |  | 600mg clopidogrel per os 6 hours prior to start of intervention | 500mg i.v. (Start of procedure) |  |  |  |  |  |  |
| 22 |  |  | 500mg i.v. (2 hours into procedure, before FD placement, total procedure took 4 hours) |  |  | 60mg per os before FD deployment. | FD occluded a few minutes after placement for which 20mg i.v. bolus was given. Thrombus mostly disappeared within 15minutes. |  | ReoPro infusion of 10mg was given after bolus of ReoPro. |
| 23 |  |  | 500mg i.v. before FD placement |  |  |  | Bolus of 20mg i.v. before FD placement and after FD placement infusion of another 8mg. |  | ReoPro infusion of 8mg was given after bolus of ReoPro. 60mg per os 2 hours before ReoPro infusion was finished. |
| 24 |  | - 300mg ASA per os 1 day prior to intervention - Prasugrel 60mg per os 1 day prior to intervention |  |  |  |  |  |  |  |
| 25 |  | - 500mg ASA 30min before start of procedure - Prasugrel 60mg per os 30 minutes before start of the procedure |  |  |  |  |  |  |  |
| 26 |  | Prasugrel 60mg per os 30 minutes before start of the procedure |  |  |  |  | 16mg i.v. bolus after FD placement (the FD occluded immediately and opened well after the bolus ReoPro). After the bolus another 14mg as infusion. |  | ASA 250mg i.v. after treatment. ReoPro infusion of 14mg after bolus. |
| 27 |  |  | 250mg i.v. after FD deployment |  |  |  | 18mg i.v. bolus right after FD deployment, followed by infusion (dose not specified) |  | ReoPro infusion after bolus. 60mg prasugrel per os 2 hours before ReoPro infusion was finished. |
| 28 |  |  |  |  |  |  | 18mg i.v. bolus right after FD deployment, followed by infusion of another 12mg |  | ReoPro infusion of 12mg after bolus. 60mg prasugrel per os 2 hours before ReoPro infusion was finished. |
| 29 |  |  | 500mg i.v. right after FD placement |  |  |  | 20mg i.v. bolus right after FD placement, followed by infusion of another 10mg |  | ReoPro infusion of 10mg was given after bolus of ReoPro. Ticagrelor 180mg per os 2 hours before ReoPro infusion was finished. |
| 30 |  |  |  |  |  |  | 18mg i.v bolus right after FD placement, followed by infusion of another 12mg. | I | ReoPro infusion of 12mg was given after bolus of ReoPro. It was planned to start prasugrel 60mg per os 2 hours before end of ReoPro infusion, but the patient’s clinical condition did not allow it. |
| 31 |  |  | 300mg i.v. during procedure. |  |  |  | 15mg i.v. bolus, followed by infusion of another 15mg. |  | ReoPro infusion of 15mg after bolus. 60mg prasugrel per os 2 hours before ReoPro infusion was finished. |
| 32 |  |  | 300mg i.v. before FD placement |  |  |  | 24mg i.v. bolus right after FD deployment, followed by infusion of another 6mg. |  | ReoPro infusion of 6mg after bolus. 60mg prasugrel per os 2 hours before ReoPro infusion was finished. |
| 33 |  |  |  |  |  |  |  |  | 60mg prasugrel per os after the patient woke up after intervention. |
| 34 |  |  | 500mg i.v. right after FD deployment |  |  |  |  |  | Patient was to get ventriculostomy after the FD procedure, prasugrel was started first after that. |
| 35 |  |  | 500mg i.v. right after FD deployment |  |  |  |  |  | Prasugrel 60mg per os right after intervention. |
| 36 |  |  | 500mg i.v. before FD deployment | 600mg per os, timing not specified |  |  | 27mg i.v. bolus right after FD deployment, followed by infusion of another 10mg. |  | ReoPro infusion of 10mg after bolus. |
| 37 |  |  | 500mg i.v. before FD deployment | 600mg per os, timing not specified |  |  | 27mg i.v. bolus right after FD deployment, followed by infusion of another 10mg. |  | ReoPro infusion of 10mg after bolus. |
| 38 |  |  | 500mg i.v. before FD deployment | 600mg per os, timing not specified |  |  | 27mg i.v. bolus right after FD deployment, followed by infusion of another 10mg. |  | ReoPro infusion of 10mg after bolus. |
| 39 |  |  | 500mg i.v., timing not specified | 600mg per os, timing not specified |  |  | 27mg i.v. bolus right after FD deployment, followed by infusion of another 10mg. |  | ReoPro infusion of 10mg after bolus. |
| 40 |  |  | 500mg i.v., timing not specified | 600mg per os, timing not specified |  |  | Bolus + infusion, dosage and timing not specified |  | ReoPro infusion after bolus. |
| 41 |  |  | 500mg i.v., timing not specified | 600mg per os, timing not specified |  |  | Bolus + infusion, dosage and timing not specified |  | ReoPro infusion after bolus. |
| 42 |  |  | 500mg i.v., timing not specified |  |  |  |  |  | ACT protection per procedurally (ACT 200-300) |
| 43 | C2 | Tinzaparin-nadrparin 2500IU x 2 | 250mg i.v., timing not specified |  |  |  |  |  | ASA 250mg i.v., timing not specified, tinzaparin-nadroparin 4500IU. |
| 44 |  |  |  |  |  |  |  |  | ACT protection per procedurally (ACT 200-300) followed by tinzaparin-nadroparin 2500IU x 3. |
| **General notes:**  **- Heparinisation: The per-procedural administered heparin dose ranged from 2500 – 9500 IU.**  **- Timing/route of administration and dose were specified as far as known.**  **1. Per os: Includes over nasogastric tube**  **2. Treatment was staged, coiling had been performed previously.**  **ACT = activated clotting time; ASA = acetylsalicylic acid; C= coils; FD = flow diverter; S = stent** | | | | | | | | | |
