# Supplementary material
Source: HighWire-hosted journal article supplement (https://jnis.bmj.com/content/12/3/283)
Supplement: inline-supplementary-material-2 [file inline-supplementary-material-2.docx]

| **Online supplementary table 2: Correlation factors with unfavorable outcome** | | | | |
| --- | --- | --- | --- | --- |
|  | ***p*-value** | **Odds ratio** | **95% C.I. for odds ratio** | |
| **Lower** | **Upper** |
| **Unfavorable WFNS (4-5) at presentation** | *0.02* | 7.09 | 1.32 | 37.99 |
| **Posterior location of aneurysm** | 0.16 | 0.33 | 0.07 | 1.53 |
| **Ultra-early treatment (day 0)** | 0.43 | 0.54 | 0.11 | 2.51 |
| **Having had an intervention related complication** | *0.04* | 5.10 | 1.05 | 24.87 |
| ***p*-values considered statistically significant are italicized, C.I. = Confidence interval; Area under the ROC curve = .77 (95% CI .62 - .92)** | | | | |
